# Supplementary material for: Salt-Mediated Au-Cu Nanofoam and Au-Cu-Pd Porous Macrobeam Synthesis
Source: PubMed Central journal article supplement (PMC6099500; doi:10.3390/molecules23071701), 2018-07-12
Supplement: molecules-23-01701-s001.pdf [file molecules-23-01701-s001.pdf]

# Salt-Mediated Au-Cu Nanofoam and Au-Cu-Pd Porous Macrobeam Synthesis

## Supporting Information

F. John Burpo<sup>1</sup>★  
Enoch A. Nagelli<sup>1</sup>  
Lauren A. Morris<sup>2</sup>  
Kamil Woronowicz<sup>1</sup>  
Alexander N. Mitropoulos<sup>1,3</sup>

<sup>1</sup> Department of Chemistry and Life Science, United States Military Academy, West Point, NY 10996, U.S.A.

<sup>2</sup> Armament Research, Development and Engineering Center, U.S. Army RDECOM-ARDEC, Picatinny Arsenal, New Jersey 07806, U.S.A.

<sup>3</sup> Department of Mathematical Sciences, United States Military Academy, West Point, NY 10996, U.S.A.

★email: [john.burpo@usma.edu](mailto:john.burpo@usma.edu)

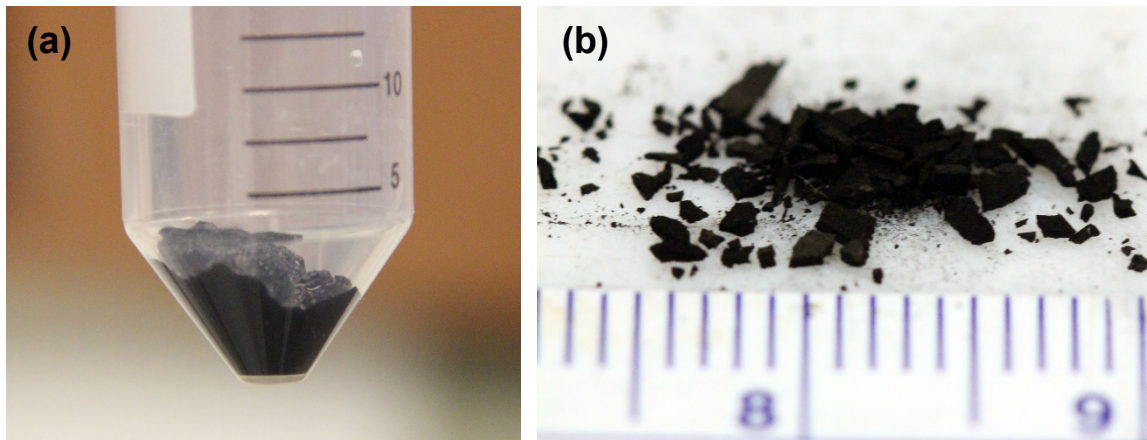

**Figure S1.** Photograph of Au-Cu nanofoam (a) compacted in deionized water, and (b) dried at ambient temperature in air.

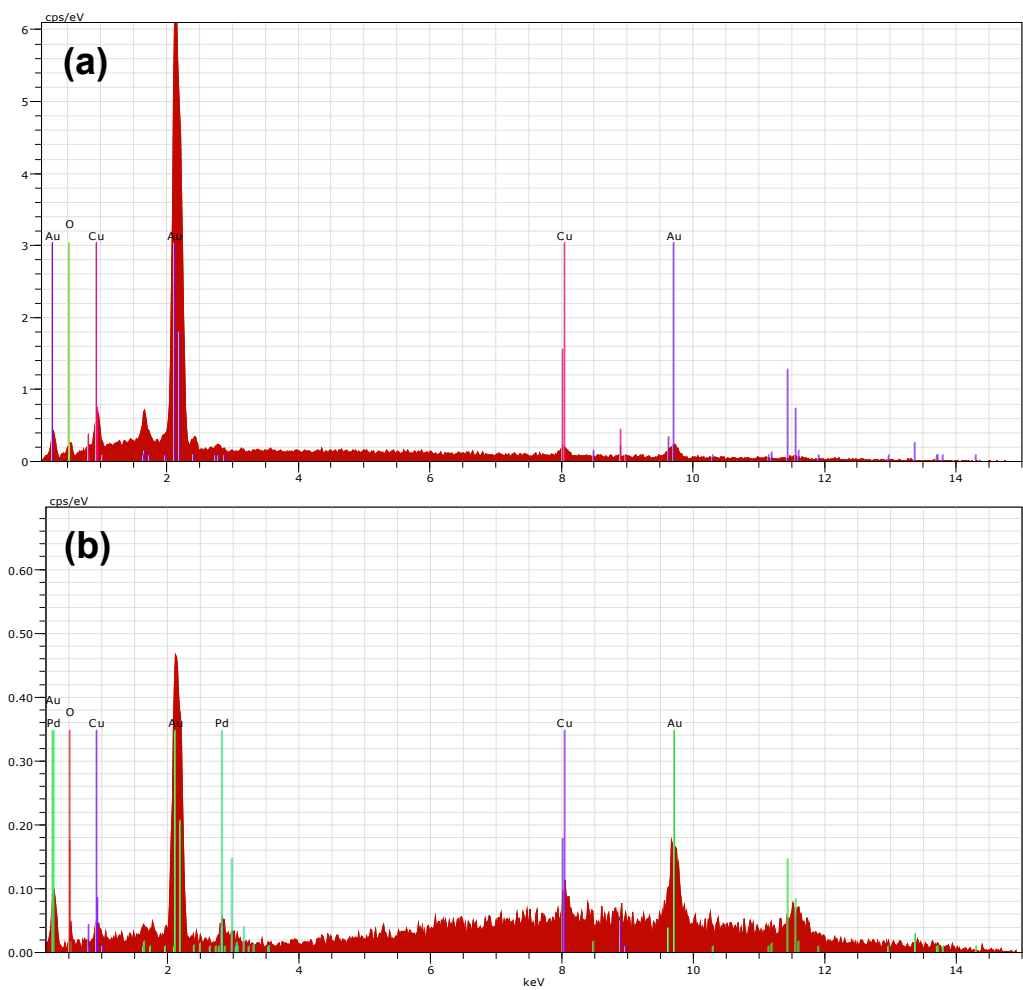

**Figure S2.** Energy dispersive X-ray spectra (EDS) of **(a)** Au-Cu nanofoams, and **(b)** Au-Cu-Pd macrobeams.

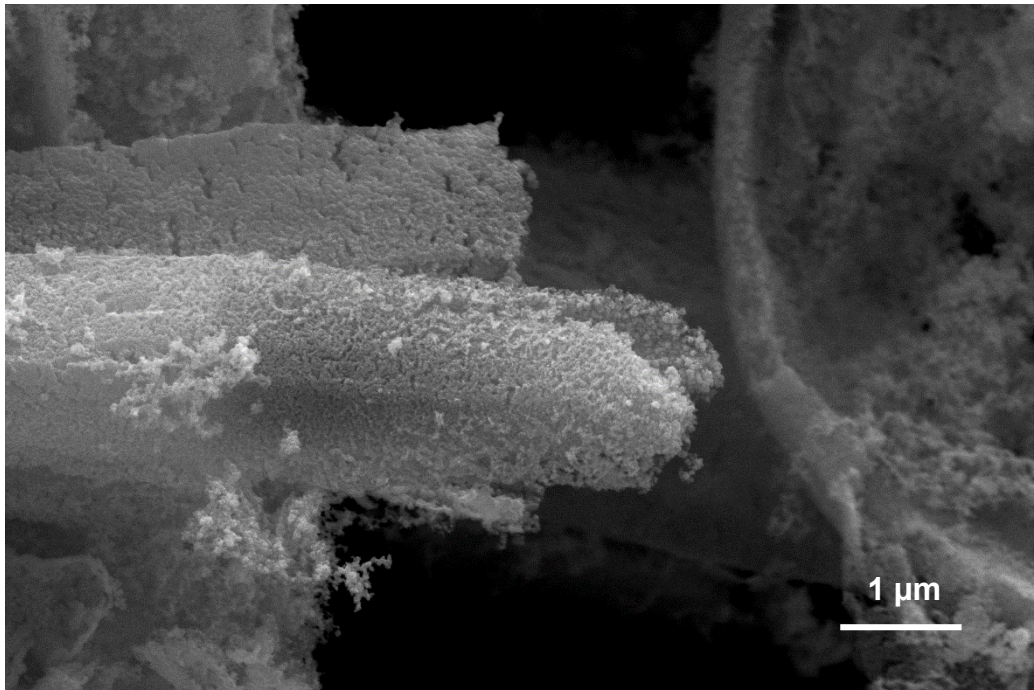

**Figure S3.** Scanning electron micrograph of Au-Cu-Pd macrobeams with porous sidewalls.

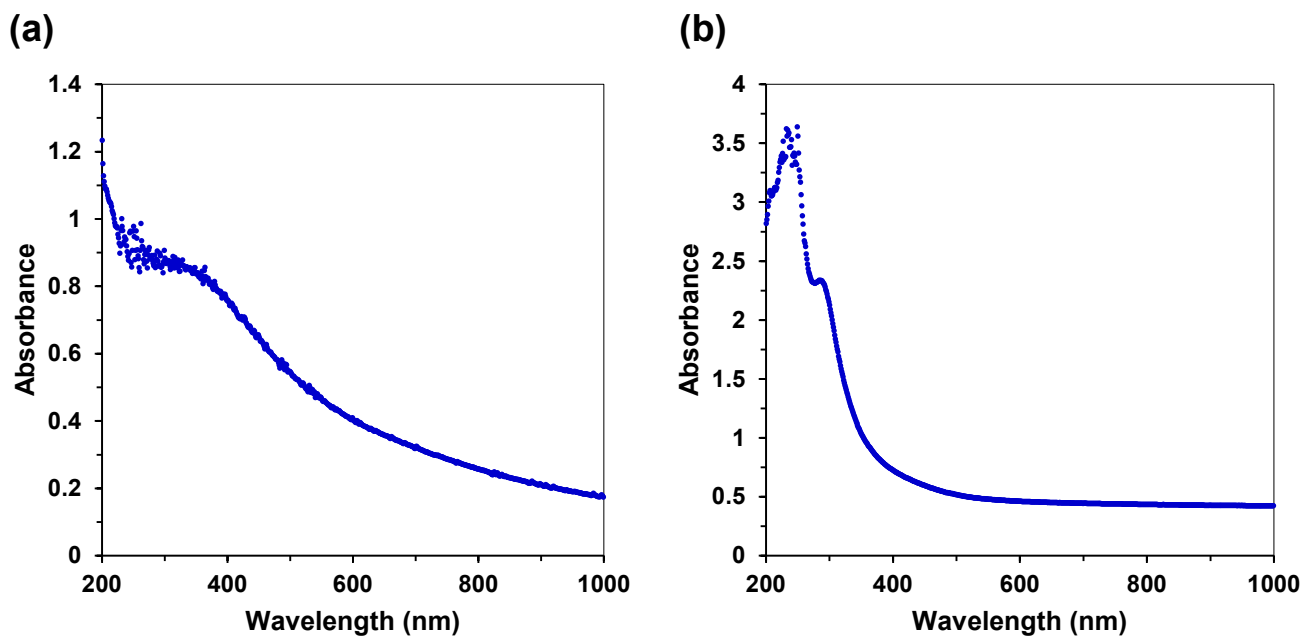

**Figure S4.** UV-VIS spectra for (a) Au-Cu precursor salts, and (b) Au-Cu-Pd precursor salts.

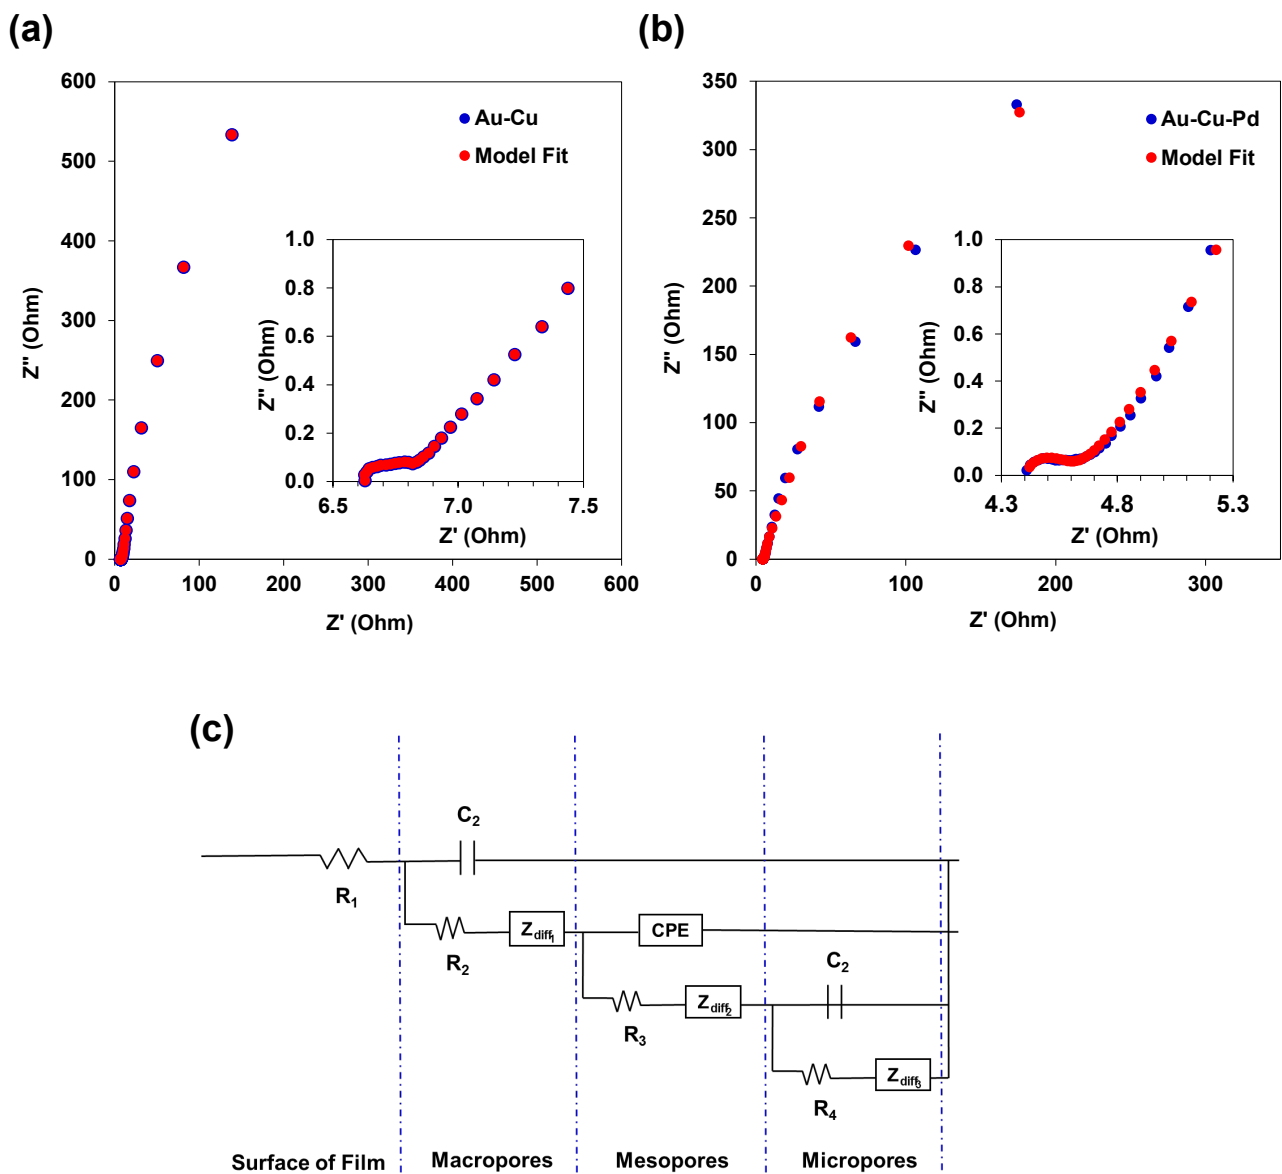

**Figure S5.** Electrochemical impedance spectra (EIS) and transmission line model (TLM) fitting for **(a)** Au-Cu nanofoams, and **(b)** Au-Cu-Pd macrobeams. **(c)** TLM equivalent circuit model.
